# Supplementary material for: pH-Responsive Drug Delivery Nanoplatforms as Smart Carriers of Unsymmetrical Bisacridines for Targeted Cancer Therapy
Source: MDPI journal article supplement (doi:10.3390/pharmaceutics15010201), 2023-01-06
Supplement: s1 [file s1]

## *Supplementary Materials*

# **pH-Responsive Drug Delivery Nanoplatfoms as Smart Carriers of Unsymmetrical Bisacridines for Targeted Cancer Therapy**

**Joanna Pilch <sup>1,\*</sup>, Agnieszka Potęga <sup>1</sup>, Agata Kowalczyk <sup>2</sup>, Artur Kasprzak <sup>3</sup>,  
Patrycja Kowalik <sup>2,3</sup>, Piotr Bujak <sup>3</sup>, Ewa Paluszkiewicz <sup>1</sup>, Ewa Augustin <sup>1</sup>  
and Anna M. Nowicka <sup>2,\*</sup>**

<sup>1</sup> Faculty of Chemistry, Gdańsk University of Technology, Narutowicza Street 11/12,  
80-233 Gdańsk, Poland

<sup>2</sup> Faculty of Chemistry, University of Warsaw, Pasteura Street 1, 02-093 Warsaw, Poland

<sup>3</sup> Faculty of Chemistry, Warsaw University of Technology, Noakowskiego Street 3,  
00-664 Warsaw, Poland

\* Correspondence: joanna.pilch@pg.edu.pl (J.P.); anowicka@chem.uw.edu.pl (A.M.N.)

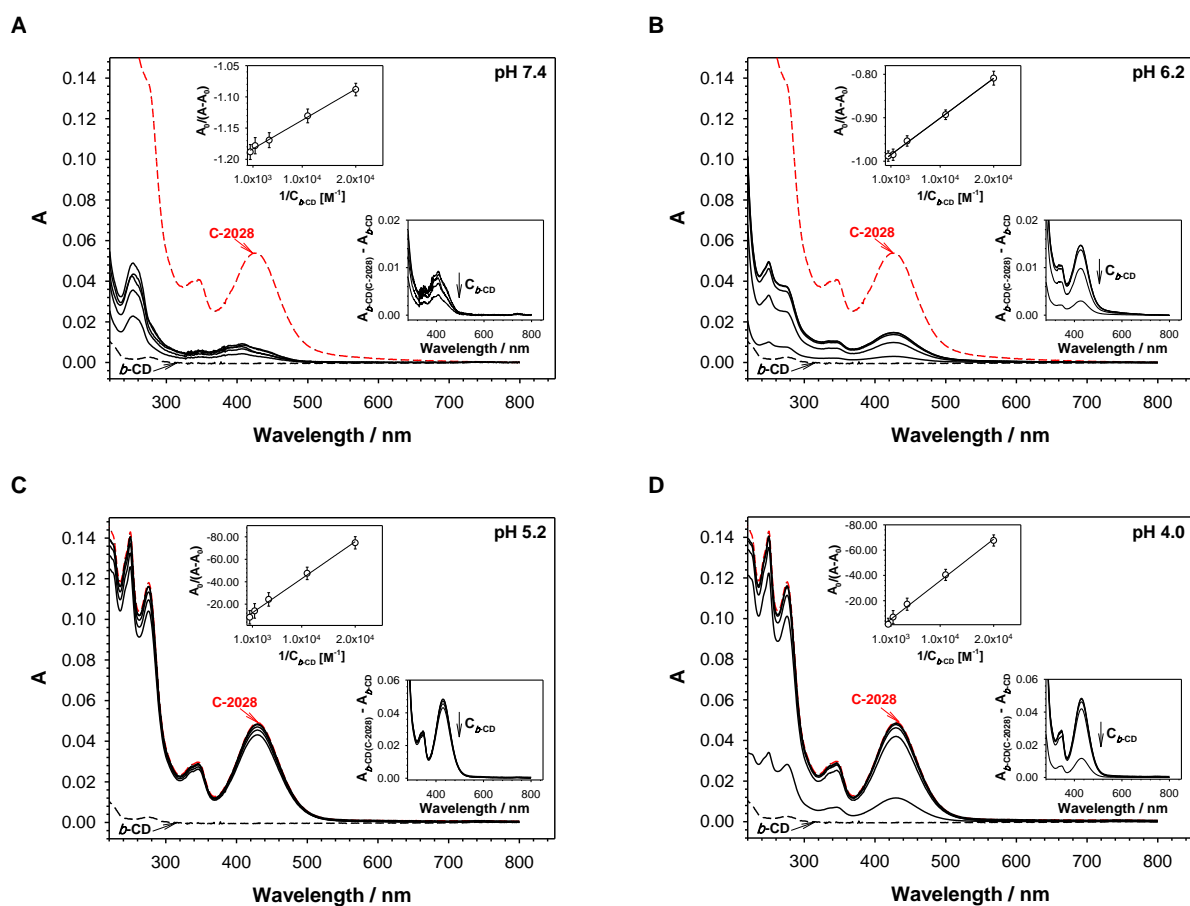

**Figure S1.** UV-Vis titration curves obtained for  $\beta$ -CD(C-2028) complex in various pH: 7.4 (A), 6.2 (B), 5.2 (C), and 4.0 (D).

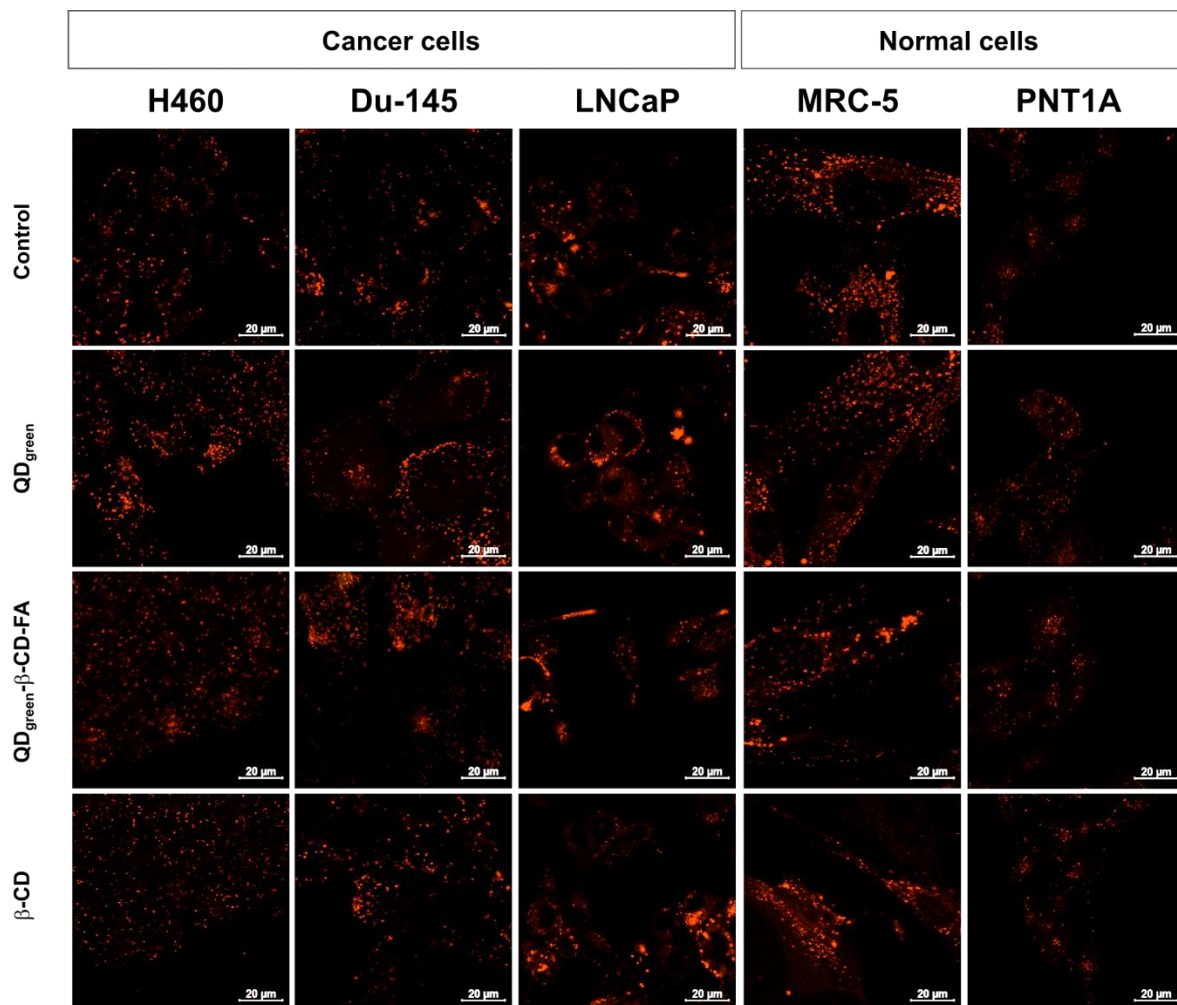

**Figure S2.** Intracellular fluorescence images of acidic organelles loaded with LysoTracker Red DND-99 in H460, Du-145, LNCaP, MRC-5, and PNT1A cells incubated with QD<sub>green</sub>, QD<sub>green</sub>-β-CD-FA, β-CD for 72 h. The scale bar is 20 μm.
